# Supplementary material
Source: publisher figshare collection journal article supplement (https://gsajournals.figshare.com/ndownloader/files/15112097)
Supplement: Supplementary file 1 [file 15112097]

## Sheet: outputkey
Plate	Row	Column	ORF	Gene	Phenotype
Target 1	A	1	control	Control	None
Target 1	A	2	control	Control	None
Target 1	A	3	YPL255W	BBP1	None
Target 1	A	4	YER107C	GLE2	None
Target 1	A	5	YLL023C	POM33	None
Target 1	A	6	control	Control	None
Target 1	A	7	YLR018C	POM34	Significant
Target 1	A	8	YPR114W	YPR114W	Significant
Target 1	A	9	YPL020C	ULP1	None
Target 1	A	10	YGL075C	MPS2	None
Target 1	A	11	YPL125W	KAP120	None
Target 1	A	12	YDL088C	ASM4	None
Target 1	B	1	control	Control	None
Target 1	B	2	YDL207W	GLE1	None
Target 1	B	3	YML103C	NUP188	None
Target 1	B	4	YFR002W	NIC96	Significant
Target 1	B	5	YIL115C	NUP159	Some
Target 1	B	6	YGL092W	NUP145	None
Target 1	B	7	YGL172W	NUP49	None
Target 1	B	8	control	Control	None
Target 1	B	9	YBR097W	VPS15	None
Target 1	B	10	YDL116W	NUP84	None
Target 1	B	11	YML031W	NDC1	None
Target 1	B	12	YJL041W	NSP1	Significant
Target 1	C	1	YER105C	NUP157	None
Target 1	C	2	YGL016W	KAP122	None
Target 1	C	3	control	Control	None
Target 1	C	4	YHR039C	MSC7	None
Target 1	C	5	YGR119C	NUP57	None
Target 1	C	6	YBL079W	NUP170	Significant
Target 1	C	7	YOR098C	NUP1	None
Target 1	C	8	YMR047C	NUP116	None
Target 1	C	9	YJR042W	NUP85	Some
Target 1	C	10	control	Control	None
Target 1	C	11	YMR153W	NUP53	None
Target 1	C	12	YAR002W	NUP60	None
Target 1	D	1	YMR129W	POM152	None
Target 1	D	2	YJL061W	NUP82	None
Target 1	D	3	YLR240W	VPS34	None
Target 1	D	4	YKR082W	NUP133	Significant
Target 1	D	5	control	Control	None
Target 1	D	6	YKL068W	NUP100	None
Target 1	D	7	YDL121C	YDL121C	Significant
Target 1	D	8	YDR424C	DYN2	None
Target 1	D	9	YKR095W	MLP1	Some
Target 1	D	10	YIL040W	APQ12	Significant
Target 1	D	11	YER053C-A	YER053C-A	None
Target 1	D	12	control	Control	None
Target 1	E	1	YJL039C	NUP192	Some
Target 1	E	2	YIL149C	MLP2	Some
Target 1	E	3	YLR326W	YLR326W	None
Target 1	E	4	YMR255W	GFD1	None
Target 1	E	5	YKL186C	MTR2	None
Target 1	E	6	YMR134W	ERG29	Some
Target 1	E	7	control	Control	None
Target 1	E	8	YDR056C	EMC10	Some
Target 1	E	9	YPR071W	YPR071W	Significant
Target 1	E	10	YJL030W	MAD2	None
Target 1	E	11	YLR064W	PER33	None
Target 1	E	12	YCR009C	RVS161	None
Target 1	F	1	YPL124W	SPC29	None
Target 1	F	2	control	Control	None
Target 1	F	3	YLR457C	NBP1	None
Target 1	F	4	YMR276W	DSK2	None
Target 1	F	5	YJL021C	YJL021C	Significant
Target 1	F	6	YIL063C	YRB2	None
Target 1	F	7	YKL042W	SPC42	None
Target 1	F	8	YPL014W	CIP1	None
Target 1	F	9	control	Control	None
Target 1	F	10	YML107C	PML39	None
Target 1	F	11	YOL072W	THP1	None
Target 1	F	12	YNL181W	PBR1	None
Target 1	G	1	YNR021W	YNR021W	None
Target 1	G	2	YDR168W	CDC37	Some
Target 1	G	3	YOR046C	DBP5	Some
Target 1	G	4	control	Control	None
Target 1	G	5	YDR388W	RVS167	None
Target 1	G	6	YPL169C	MEX67	None
Target 1	G	7	YNL251C	NRD1	None
Target 1	G	8	YDR307W	PMT7	None
Target 1	G	9	YML020W	YML020W	None
Target 1	G	10	YBR225W	YBR225W	None
Target 1	G	11	control	Control	None
Target 1	G	12	YLR347C	KAP95	Some
Target 1	H	1	YDL028C	MPS1	None
Target 1	H	2	YOR112W	CEX1	None
Target 1	H	3	YGL086W	MAD1	None
Target 1	H	4	YDR186C	SND1	None
Target 1	H	5	YDR159W	SAC3	None
Target 1	H	6	control	Control	None
Target 1	H	7	YEL043W	YEL043W	None
Target 1	H	8	YER110C	KAP123	None
Target 1	H	9	YGR218W	CRM1	None
Target 1	H	10	YLL003W	SFI1	None
Target 1	H	11	YER155C	BEM2	None
Target 1	H	12	control	Control	None
